# Supplementary material for: Effects of Increasing Indoor Negative Air Ions on Cognitive Performance and Health of High Pure CO2 Level-Exposed College Students
Source: Hindawi journal article supplement (doi:10.1155/2023/8298339), 2023-03-15
Supplement: f1 [file 8298339.f1.docx]

**Supplemental Materials**

**Title:**

Effects of increasing indoor negative air ions on cognitive performance and health of high pure CO2 level-exposed college students

**Authors:**

Miao Guoa, b, Wei Yua, b*, Yuqi Suna, b, Lexiang Wanga, b, Haixia Zhoua, b, Yan Zhanga, b

**Affiliation/address:**

a Joint International Research Laboratory of Green Buildings and Built Environments (Ministry of Education), Chongqing University, Chongqing 400045, China

b National Centre for International Research of Low-carbon and Green Buildings (Ministry of Science and Technology), Chongqing University, Chongqing 400045, China

* Corresponding author. E-mail address: yuweicqu@cqu.edu.cn (Wei Yu). Telephone number: +86 13594093200

**Supplemental Figures**


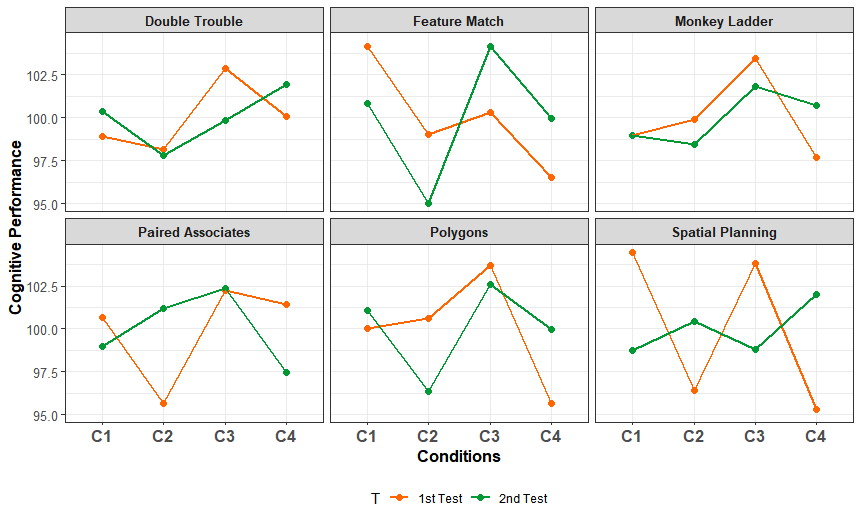


Figure S1 Estimated marginal means of cognitive tests that have no significant association with exposure conditions. (C1: NAIs + 500 ppm CO2, C2:500 ppm CO2, C3: NAIs + 2500 ppm CO2, and C4:2500 ppm CO2)


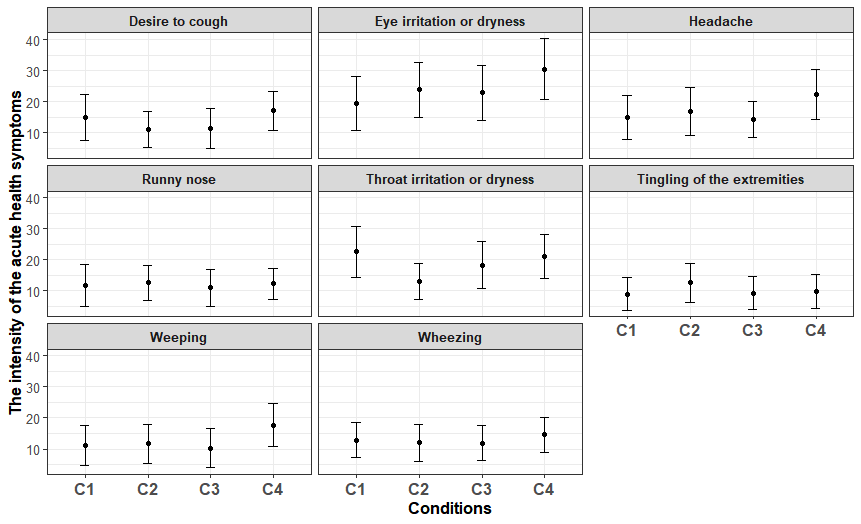


Figure S2 Estimated marginal means and 95 % CI of acute health symptoms intensity that have no significant association with exposure conditions. (C1: NAIs + 500 ppm CO2, C2:500 ppm CO2, C3: NAIs + 2500 ppm CO2, and C4:2500 ppm CO2)


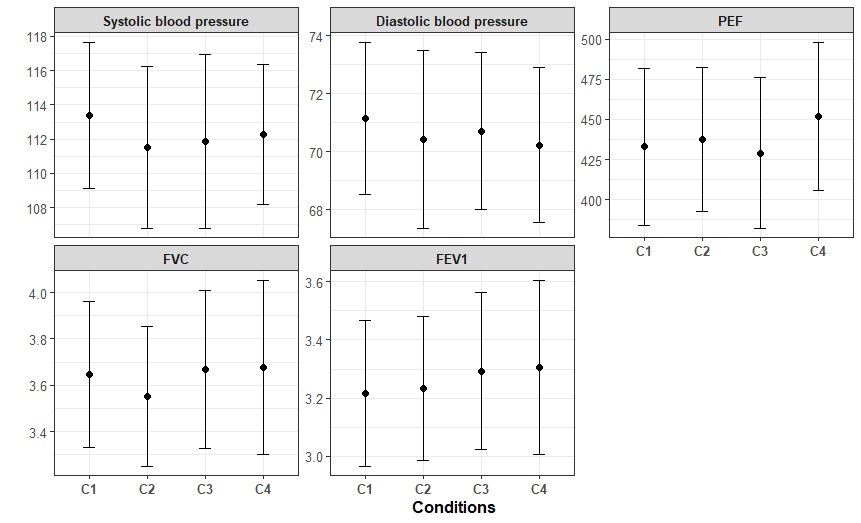


Figure S3 Estimated marginal means and 95 % CI of health indicators that have no significant association with exposure conditions. (C1: NAIs + 500 ppm CO2, C2:500 ppm CO2, C3: NAIs + 2500 ppm CO2, and C4:2500 ppm CO2)
